# Supplementary material for: Simple preparation of PVDF composite flexible film with transparent, self-cleaning and radiative cooling properties
Source: Royal Society of Chemistry journal article supplement (doi:10.1039/d4ra06819j), 2024-01-01
Supplement: d4ra06819j1.pdf [file d4ra06819j1.pdf]

# Simple preparation of PVDF composite flexible film with transparent, self-cleaning and radiative cooling properties

*Junxia Mao*<sup>a</sup>, *Xinyu Tan*<sup>a,\*</sup>, *Weiwei Hu*<sup>b</sup>, *Chao Shi*<sup>b</sup>, *Fan Zhou*<sup>c</sup>,  
*Alkiviadis Tsamis*<sup>d,e</sup>

<sup>a</sup>*College of Materials and Chemical Engineering, Hubei Provincial Engineering Research Center for Solar Energy High-value Utilization and Green Conversion, China Three Gorges University, Hubei Provincial, Yichang, China*

<sup>b</sup>*College of Electrical Engineering & New Energy, Hubei Provincial Collaborative Innovation Center for New Energy Microgrid, China Three Gorges University, 8 University Avenue, Yichang, 443002, PR China*

<sup>c</sup>*State Grid Hubei Direct Current Operation Research Institute, Yichang, Hubei, 443000, China*

<sup>d</sup>*Department of Mechanical Engineering, University of Western Macedonia, Kozani, 50100, Greece*

<sup>e</sup>*School of Engineering, University of Leicester, Leicester, LE1 7RH, United Kingdom*

## Experimental Supplementary results

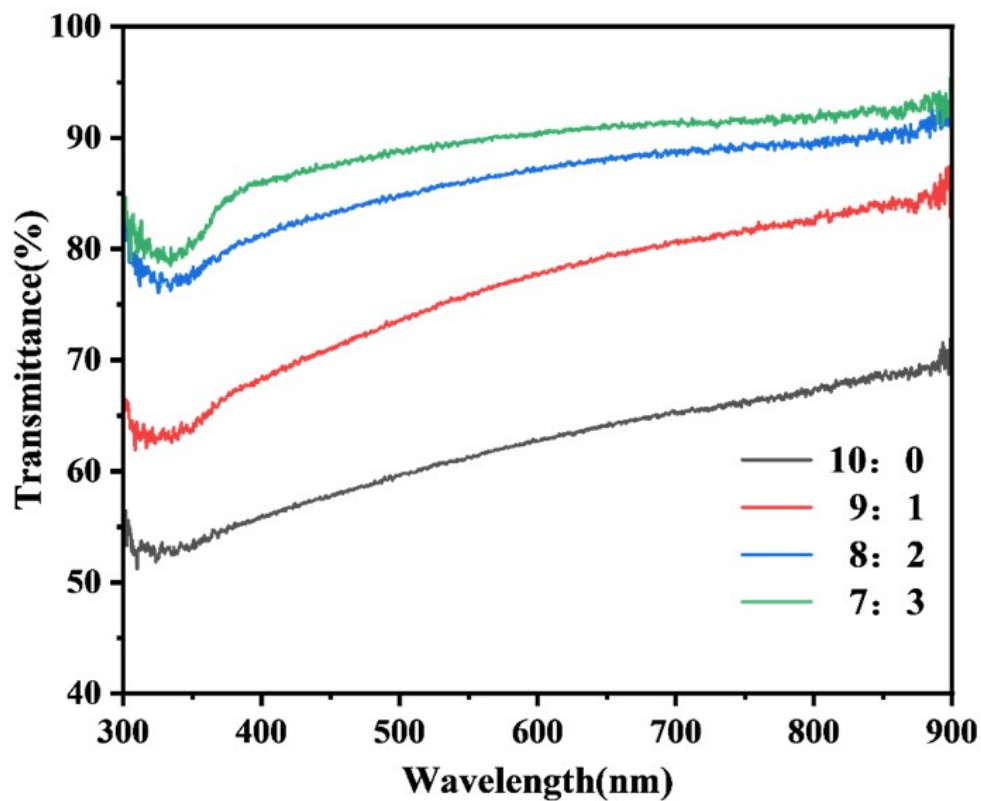

**Fig.S1** Ultraviolet-visible transmittance of PVDF/PMMA films of different proportions.

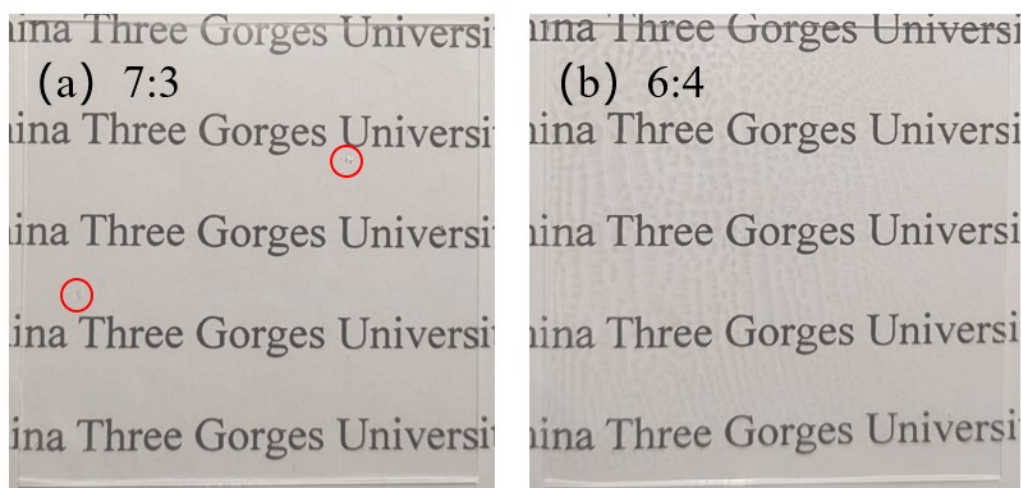

**Fig.S2** Optical images of PVDF/PMMA films with different proportions.

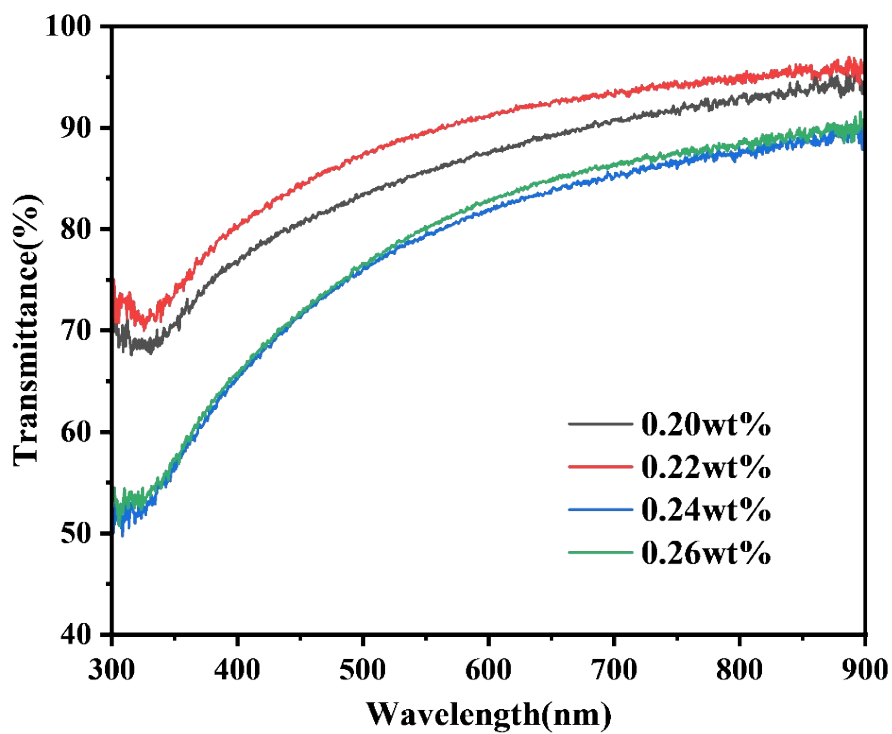

Fig.S3 Ultraviolet-visible transmittance of fluorinated films of different proportions.

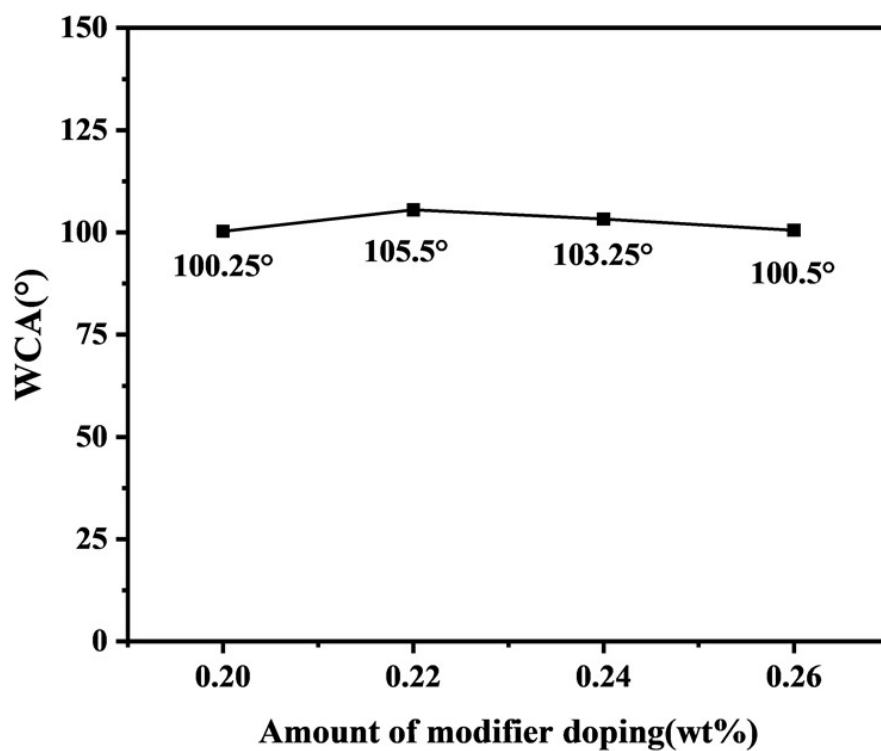

Fig.S4 Water contact angle of fluorinated films of different proportions.

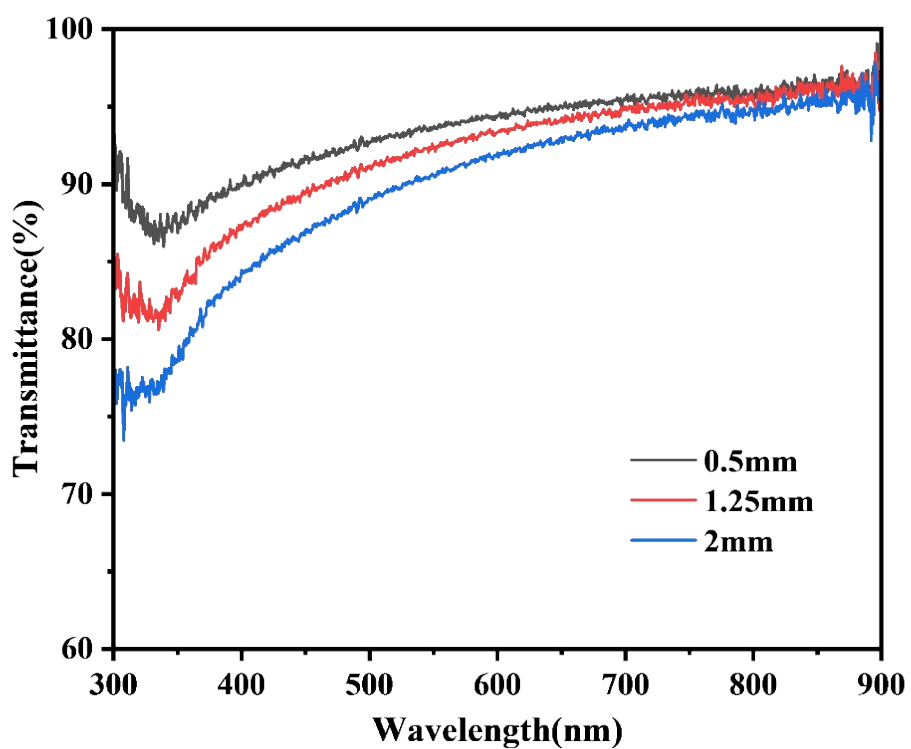

Fig.S5 Ultraviolet-visible transmittance of PPF film at different coating thicknesses.

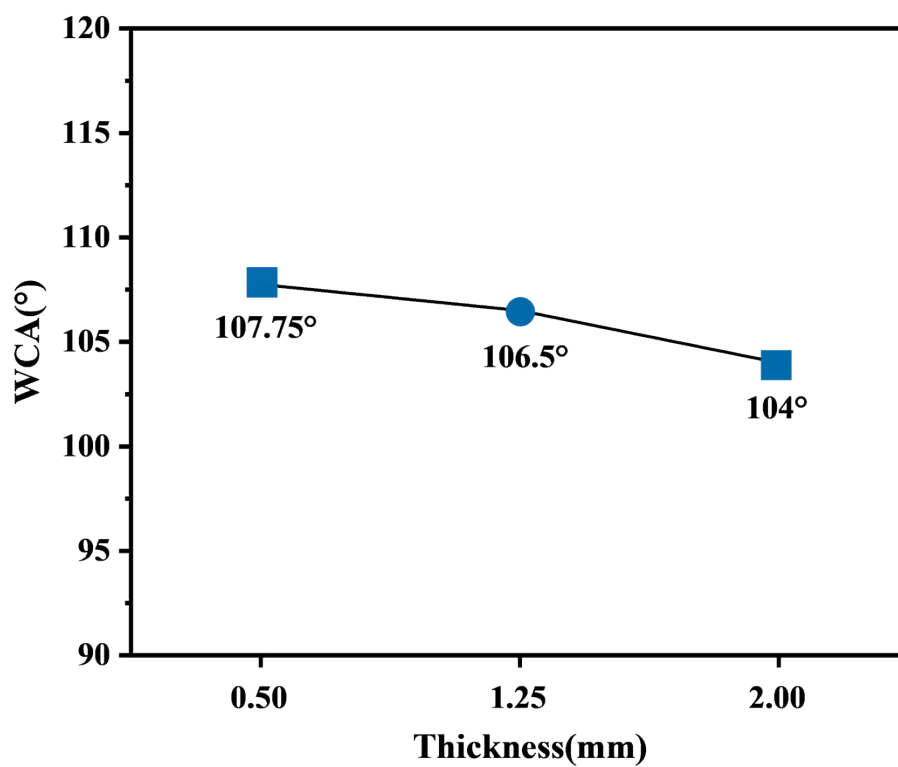

Fig.S6 Water contact angle of PPF film at different coating thickness.

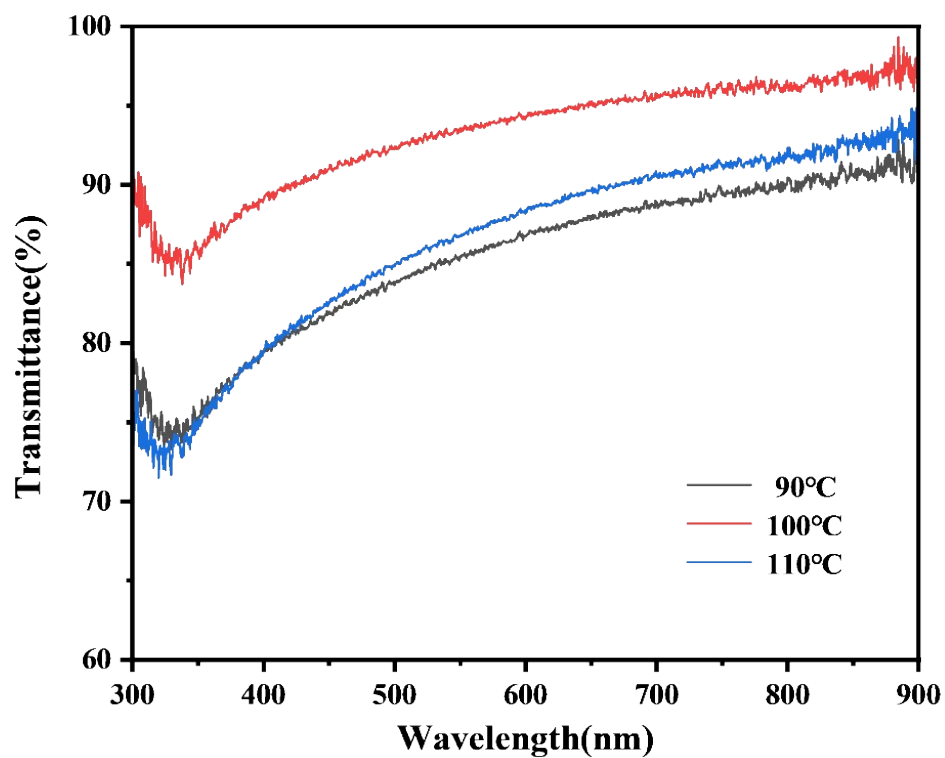

Fig.S7 Ultraviolet-visible transmittance of PPF film at different drying temperatures.

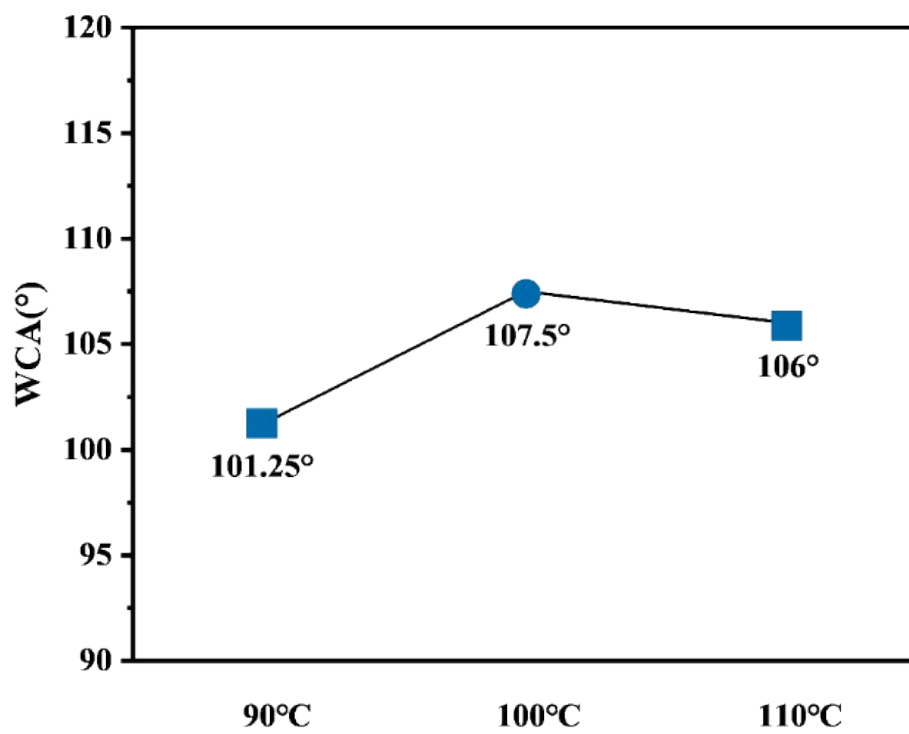

Fig.S8 Water contact angle of PPF film at different drying temperatures.

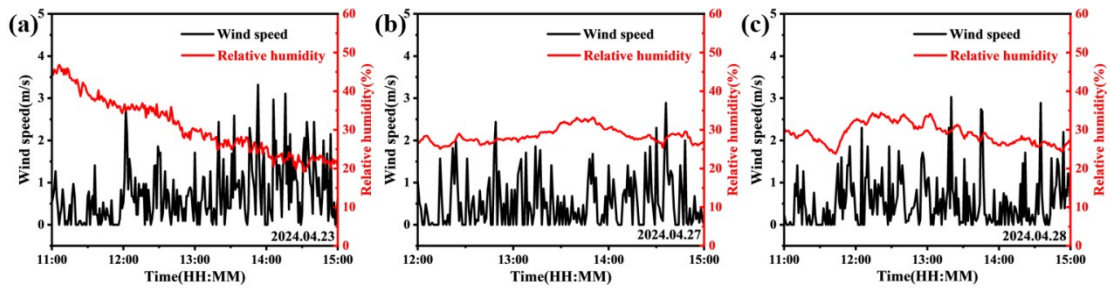

**Fig.S9** Radiative cooling experiment: Wind speed and relative humidity as a function of time on different dates (a-c) of passive radiation cooling performance experiments. a: 2024.04.23; b: 2022.04.27; c: 2022.04.28.

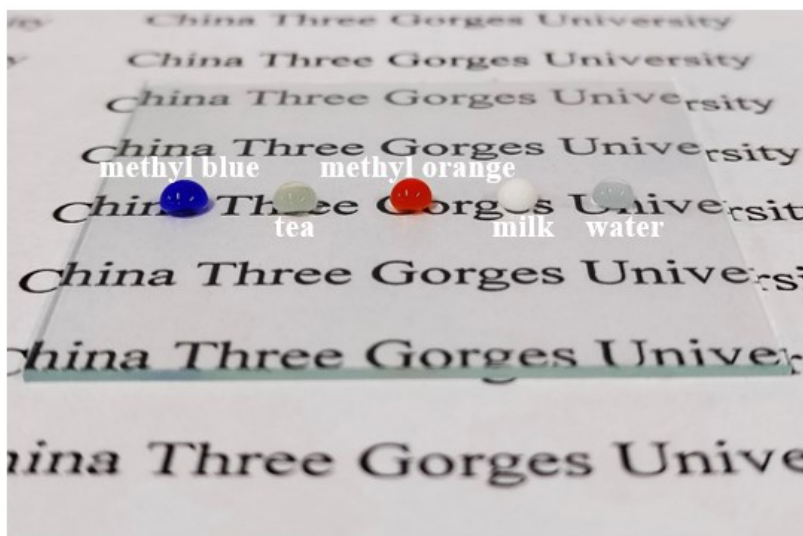

**Fig.S10** Photograph of various liquids (i.e., methyl blue, tea, methyl orange, milk and water).
